# Supplementary material for: Comparison of Charge Transport and Opto-Electronic Properties of Pyrene and Anthracene Derivatives For OLED Applications
Source: Research Square preprint supplement (doi:10.21203/rs.3.rs-259089/v1), 2021-03-11
Supplement: Supplementary file 1 [file cb9aaae3348eec4646f3e1e7.docx]

**Supporting Information**


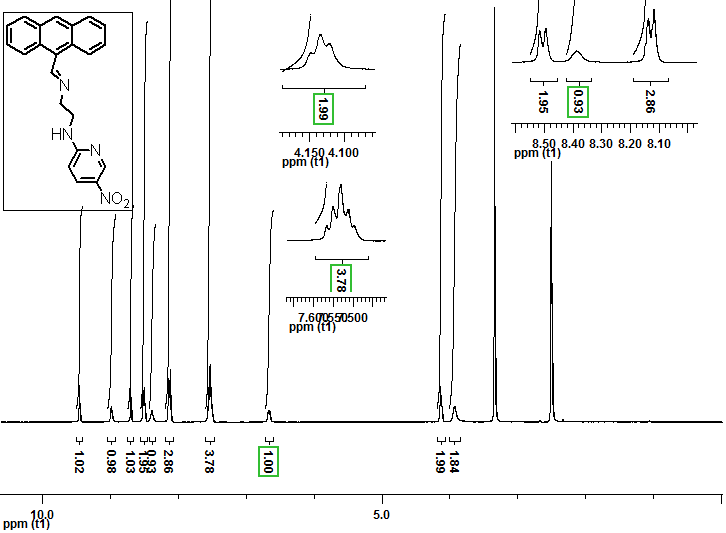


**Figure S1.** 1H-NMR spectrum of 9-[(5-nitropyridin-2-aminoethyl)iminiomethyl]-anthracene.


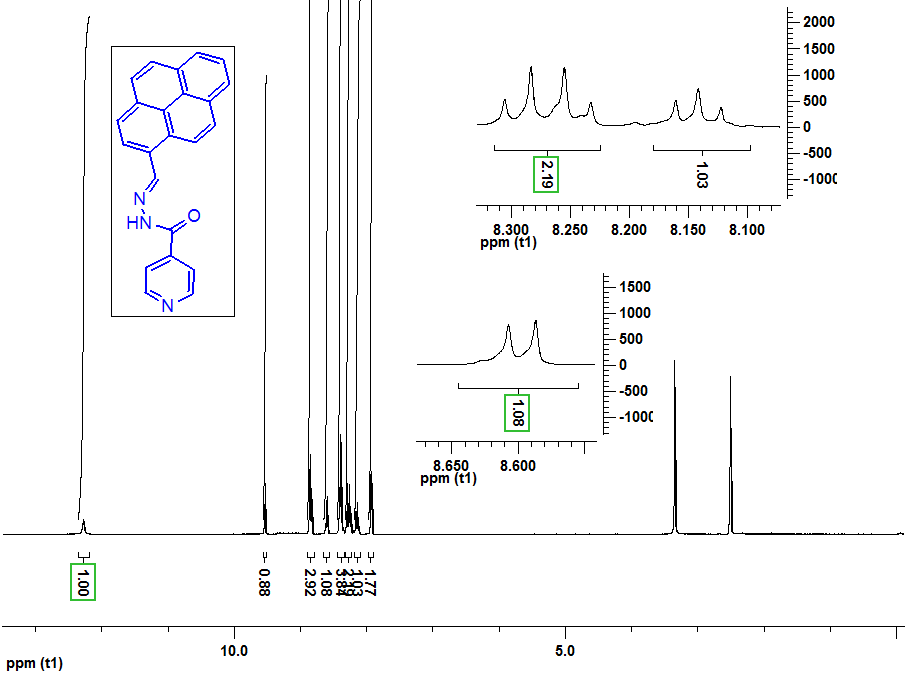


**Figure S2.** 1H-NMR spectrum of 9-[(5-nitropyridin-2-aminoethyl)iminiomethyl]-anthracene
